# Supplementary material for: Rapid behavioral changes during early development in Peters’ tent-making bat (Uroderma bilobatum)
Source: PLoS One. 2018 Oct 24;13(10):e0205351. doi: 10.1371/journal.pone.0205351 (PMC6200227; doi:10.1371/journal.pone.0205351)
Supplement: S5 Dataset — (CSV) [file pone.0205351.s005.csv]

Date(yyyy-mm-dd)	Day of birthing season	Forearm pulsing?	Outcome	Observation order	Interaction period(seconds)	Pulsing(seconds)	Mother self-grooming(seconds)	Mother grooming pup(seconds)	Mother stretching(seconds)	Mother nudging pup(seconds)	Pup stretching(seconds)	Pup self-grooming(seconds)	Pup switching nipples(seconds)	Pup shifting(seconds)	Pup trying to reattach(seconds)	Pup licking mother(seconds)	Mother pushing pup(seconds)	Pup reattach(frequency)	Pup latency to depart after mother(seconds)
2014-07-08	27	yes	not carried	1	260.4	51.8	132.4	63	6.4	1.4	27.8	0	2.8	33.2	10.8	0	0	3	20919.2
2014-07-08	27	yes	not carried	2	155.6	41.4	1.6	14.2	10.8	0	13.8	0	2.8	52	6.4	23.4	19.2	3	3015
2014-07-08	27	yes	carried	3	1246.4	717.2	84.6	334	5	0	172.4	146.8	6.6	268	0	0	2.4	0	NA
2014-07-08	27	yes	not carried	4	112	53.2	19.8	0	8	0	4.4	77.8	0	25.2	4.8	0	0	2	2766.6
2014-07-08	27	yes	not carried	5	120.4	5.6	98.2	0	4.4	0	10.2	18.8	0	5.8	0	0	0	0	17947.8
2014-07-08	27	yes	not carried	6	26.2	18.2	0	0	5.4	0	4	0	0	11.6	3.8	0	0	1	2293.6
2014-07-08	27	yes	carried	7	871.2	593.4	78.8	27.8	5.4	0	49.6	18.4	6.8	27.6	0	0	0	0	NA
2014-07-08	27	yes	carried	8	731.2	638.4	11	27.4	0	0	3.4	3.8	0	59.6	0	0	0	0	NA
2014-07-08	27	no	NA	9	0	0	NA	NA	NA	NA	NA	NA	NA	NA	NA	NA	NA	NA	1498.2
2014-07-08	27	yes	not carried	10	50.6	15.8	12.8	9	7.4	0	9	0	0	29.6	12	0	0	1	542.2
2014-07-08	27	no	NA	11	0	0	NA	NA	NA	NA	NA	NA	NA	NA	NA	NA	NA	NA	28283.6
2014-07-10	29	yes	not carried	1	252.2	88.2	154.2	26	6.4	1	16.6	98.6	12.2	40.8	7.8	0	0	1	4480
2014-07-10	29	yes	not carried	2	183	16.8	0.8	72	14.2	0	12.2	43.8	4.8	81.2	4	0	0	2	1658.8
2014-07-10	29	yes	not carried	3	291	21.4	206	0	2.8	0	7	236	0	22.4	24.2	0	0	3	2380.8
2014-07-10	29	no	NA	4	0	0	NA	NA	NA	NA	NA	NA	NA	NA	NA	NA	NA	NA	1935.8
2014-07-10	29	yes	not carried	5	544.2	357	113.8	15.6	11.8	0	48	32.6	15	82.4	10	0	0	3	1237.4
2014-07-10	29	yes	carried	6	1278	1149.8	24.6	74.4	0	0	53	124.2	3	241	0	0	0	0	NA
2014-07-10	29	yes	not carried	7	361.6	223.8	250	31.8	4.2	0	29.2	79	2.8	112.8	0	0	0	0	2823.2
2014-07-10	29	yes	not carried	8	384.6	189	24.2	45.4	0	0	40.6	0	0	20.4	0	0	0	0	1593.2
2014-07-10	29	no	NA	9	0	0	NA	NA	NA	NA	NA	NA	NA	NA	NA	NA	NA	NA	965.8
2014-07-10	29	yes	carried	10	1195.8	862.4	16	272.4	6.2	0	116.8	129.4	2.4	193.2	0	0	0	0	NA
2014-07-10	29	no	NA	11	0	0	NA	NA	NA	NA	NA	NA	NA	NA	NA	NA	NA	NA	NA
2014-07-10	29	yes	not carried	12	278	71.8	168	0	9.2	0	6.4	0	0	17.4	0	0	0	0	2379.4
2014-07-10	29	yes	not carried	13	69.2	28.2	14	0	8	0	2	33.4	0	6.2	0	0	0	0	748
2014-07-12	31	yes	not carried	1	249.4	48.6	161.8	0	4	0	12	10	0	25.2	0	0	0	0	2467.2
2014-07-12	31	yes	not carried	2	71	9.6	48.4	0	3.6	0	7.8	29.6	2	18.2	6.2	0	0	0	737
2014-07-12	31	yes	not carried	3	147.8	26.4	66	0	3.2	0	17.2	50.4	0	1.6	0	0	0	0	2171.2
2014-07-12	31	no	NA	4	0	0	NA	NA	NA	NA	NA	NA	NA	NA	NA	NA	NA	NA	906.6
2014-07-12	31	no	NA	5	0	0	NA	NA	NA	NA	NA	NA	NA	NA	NA	NA	NA	NA	NA
2014-07-12	31	yes	not carried	6	56.4	10.4	10	0	0	0	2.4	2	4.8	33.8	5.2	0	0	1	1247
2014-07-12	31	yes	not carried	7	375.8	67.8	238.4	67.6	15.4	0	30.2	73.6	0	87.4	16.6	0	0	3	2745.2
2014-07-12	31	yes	not carried	8	6.4	6.6	0	0	0	0	0	0	0	2	0.8	0	0	0	1650.2
2014-07-12	31	no	NA	9	0	0	NA	NA	NA	NA	NA	NA	NA	NA	NA	NA	NA	NA	NA
2014-07-12	31	yes	carried	10	764.4	619	19.2	88.2	1.4	0	52.2	61.4	0	317.6	0	0	0	0	NA
2014-07-12	31	yes	not carried	11	156.4	82.4	51.2	2.6	10.4	0	22.6	18	6.8	68.6	12.4	0	0	2	75
2014-07-12	31	no	NA	12	0	0	NA	NA	NA	NA	NA	NA	NA	NA	NA	NA	NA	NA	2081
2014-07-15	34	no	NA	2	0	0	NA	NA	NA	NA	NA	NA	NA	NA	NA	NA	NA	NA	NA
2014-07-15	34	yes	carried	3	98.4	34.8	0	0	4.2	0	0	0	0	0	0	0	0	0	NA
2014-07-15	34	yes	not carried	4	224	29.6	9.2	7.8	5.6	0	17.4	14	0	2.8	0	0	0	0	2770.8
2014-07-15	34	yes	not carried	5	83.4	44.4	37.6	0	0	0	10	3.2	0	11.8	4	0	0	2	74.6
2014-07-15	34	yes	carried	7	575	507.6	54.2	0	0	0	13.2	9.4	0	62	0	0	0	0	NA
